# Supplementary material for: Colorimetric detection of water content in organic solvents via a smartphone with fluorescent Ag nanoclusters
Source: Royal Society of Chemistry journal article supplement (doi:10.1039/d1ay00497b), 2021-01-01
Supplement: d1ay00497b1.pdf [file d1ay00497b1.pdf]

**Electronic supplementary information for**

**Colorimetric Detection of Water Contents in Organic Solvent via  
Smartphone with Fluorescent Ag Nanoclusters**

Ningxin Kong,<sup>a</sup> Hao Yuan,<sup>a</sup> Huangmei Zhou,<sup>a</sup> Yu Zhao,<sup>a</sup> Sanjun Zhang<sup>a, b, c\*</sup>

<sup>a</sup>State Key Laboratory of Precision Spectroscopy, East China Normal University, No.500, Dongchuan Road,  
Shanghai 200241, China

<sup>b</sup>Collaborative Innovation Center of Extreme Optics, Shanxi University, Taiyuan, Shanxi 030006, China

<sup>c</sup>NYU-ECNU Institute of Physics at NYU Shanghai, No.3663, North Zhongshan Rd., Shanghai 200062, China.

\*Correspondence to S.Z. (email: [sjzhang@phy.ecnu.edu.cn](mailto:sjzhang@phy.ecnu.edu.cn))

## Supporting materials

|                                                                                                                                           |    |
|-------------------------------------------------------------------------------------------------------------------------------------------|----|
| <b>Figure S1:</b> Infrared spectra of PMVEM and PMVEM-Ag NCs. ....                                                                        | S3 |
| <b>Figure S2:</b> EDX of PMVEM-Ag NCs. ....                                                                                               | S3 |
| <b>Figure S3:</b> The UV-Vis absorption spectra of Ag NCs in ethanol. ....                                                                | S3 |
| <b>Figure S4:</b> The photograph of samples in ethanol under the excitation of 365 nm. ...                                                | S4 |
| <b>Figure S5:</b> The colour of PMVEM-Ag NCs in ethanol under natural light. ....                                                         | S4 |
| <b>Figure S6:</b> TEM image of PMVEM-Ag NCs dispersed in DMSO. ....                                                                       | S4 |
| <b>Figure S7:</b> DLS of PMVEM-Ag NCs measured in water, DMSO and ethanol. ....                                                           | S5 |
| <b>Figure S8:</b> The emission spectra PMVEM-Ag NCs in ethanol. ....                                                                      | S5 |
| <b>Figure S9:</b> The response time of PMVEM-Ag NCs in ethanol. ....                                                                      | S5 |
| <b>Figure S10:</b> The fluorescence spectra of PMVEM-Ag NCs measured in different time.                                                   | S6 |
| <b>Figure S11:</b> Schematic illustration of water detection. ....                                                                        | S6 |
| <b>Figure S12:</b> The detection result determined by different brands and models<br>smartphone and different kinds of applications. .... | S6 |
| <b>Figure S13:</b> Colorimetric smartphone-based detection of water contents in<br>DMSO. ....                                             | S7 |
| <b>Figure S14:</b> The linear relationship between R value and water contents in<br>ethanol. ....                                         | S7 |
| <b>Table S1:</b> The color data of Ag NCs in DMSO. ....                                                                                   | S8 |
| <b>Table S2:</b> The color data of Ag NCs in ethanol. ....                                                                                | S9 |
| <b>Table S3:</b> Comparison of detection of water in ethanol based on different fluorescence<br>nanomaterials. ....                       | S9 |

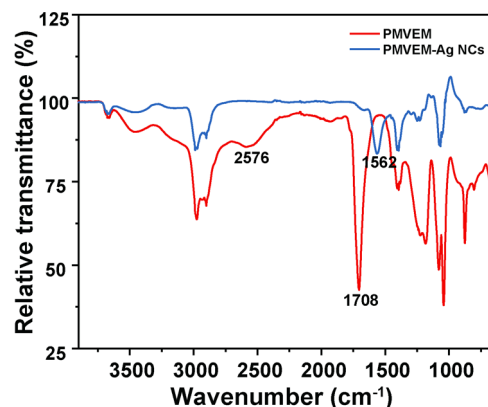

Fig. S1. Infrared spectra of PMVEM and PMVEM-Ag NCs.

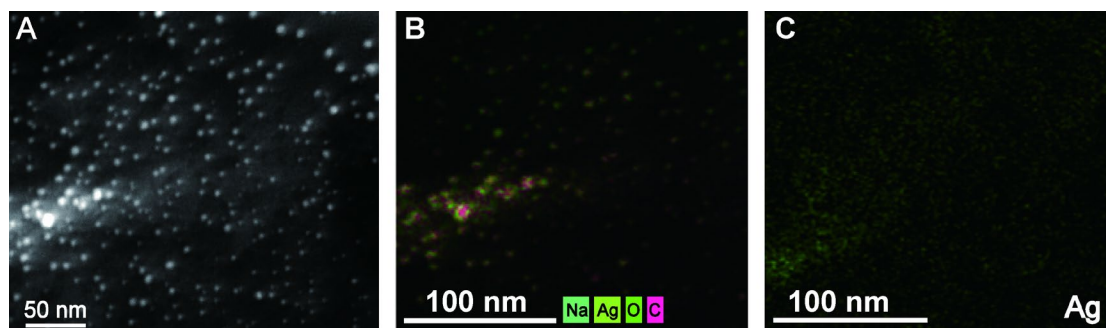

Fig. S2. (A) High-angle annular dark-field scanning transmission electron microscopy (HAADF-STEM) image of PMVEM-Ag NCs. (B) The corresponding elemental mapping of PMVEM-Ag NCs. (C) The elemental mapping of Ag in PMVEM-Ag NCs.

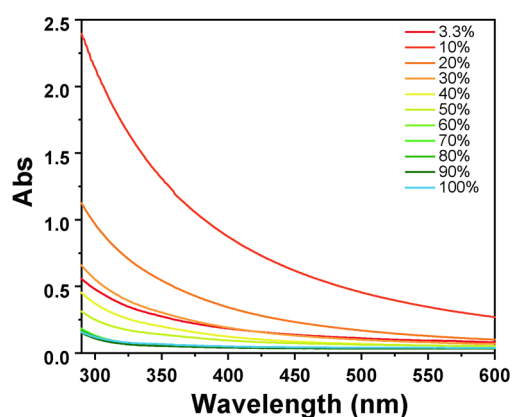

Fig. S3. The UV-Vis absorption spectra of Ag NCs in ethanol with different water contents from 3.3% to 100%. The Ag NCs were directly added into the ethanol solvent with different water contents.

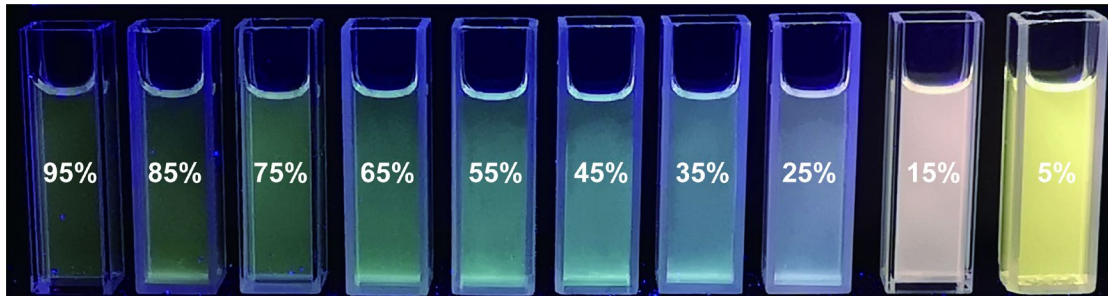

Fig. S4. The picture of samples in ethanol with water contents from 5% to 95% under UV excitation at 365 nm. The Ag NCs were directly added into the ethanol solvent with different water contents.

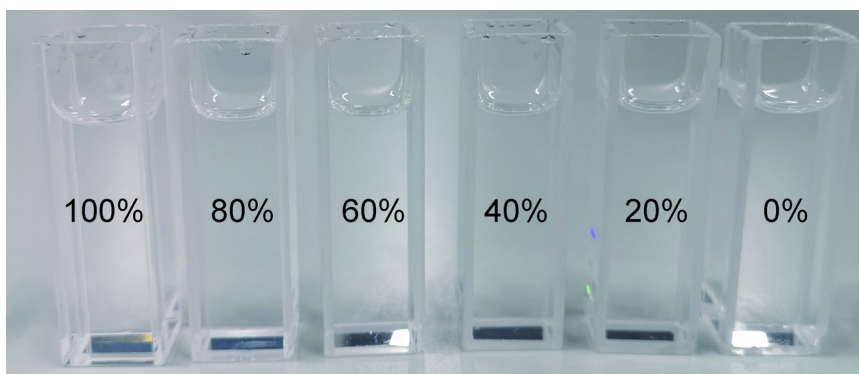

Fig. S5. The colour of PMVEM-Ag NCs in ethanol with different water contents under natural light.

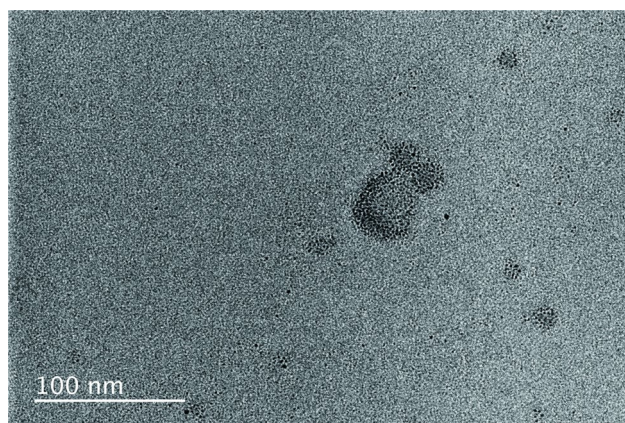

Fig. S6. TEM image of PMVEM-Ag NCs dispersed in DMSO.

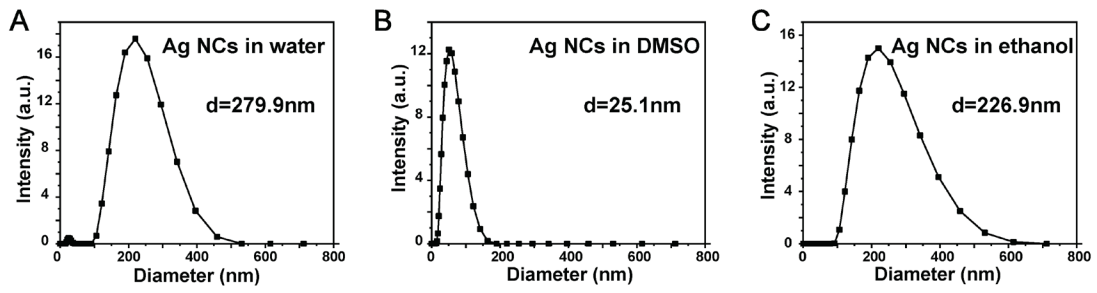

Fig. S7. Dynamic light scattering (DLS) of PMVEM-Ag NCs measured in water (A), DMSO (B) and ethanol (C). The respective hydrodynamic diameter is shown in the figure.

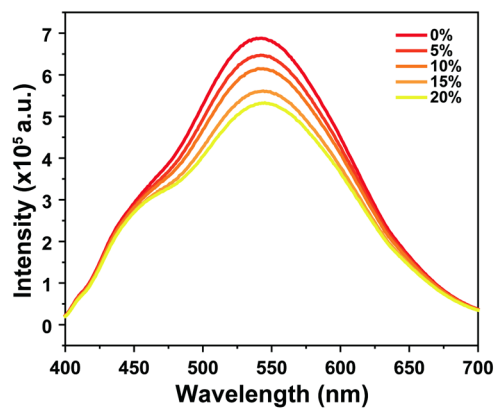

Fig. S8. Emission spectra of PMVEM-Ag NCs in ethanol with the increasing of water contents from 0% to 20%.

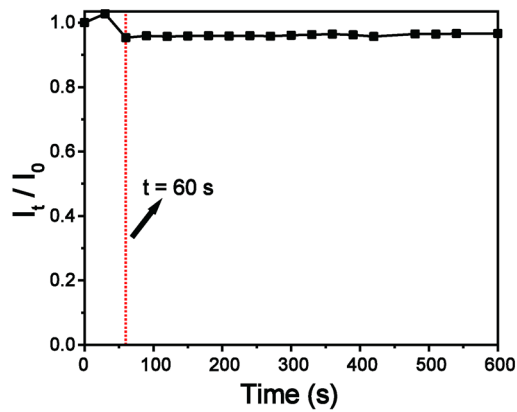

Fig. S9. The response time of PMVEM-Ag NCs in ethanol.

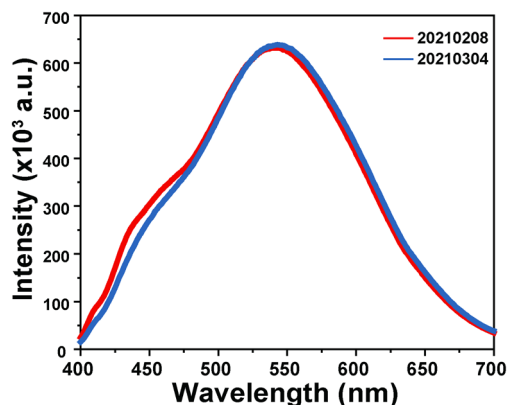

Fig. S10. The fluorescence spectra of PMVEM-Ag NCs dispersed in ethanol with 94% water at different dates (Feb./08/2021 and Mar./04/2021).

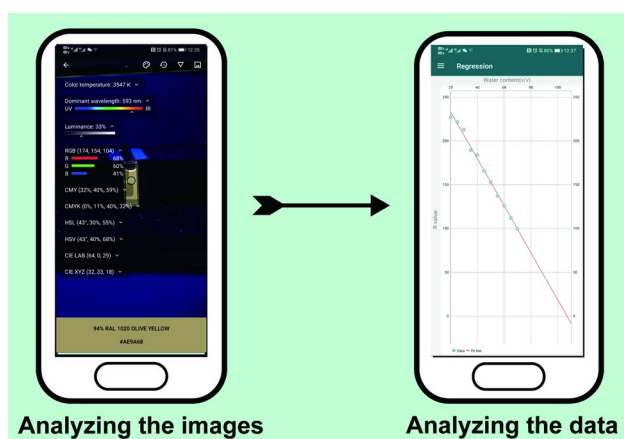

Fig. S11. Schematic illustration of water detection in organic solvents by smartphone through color analysis application (Color Picker) and linear analysis application (Regression).

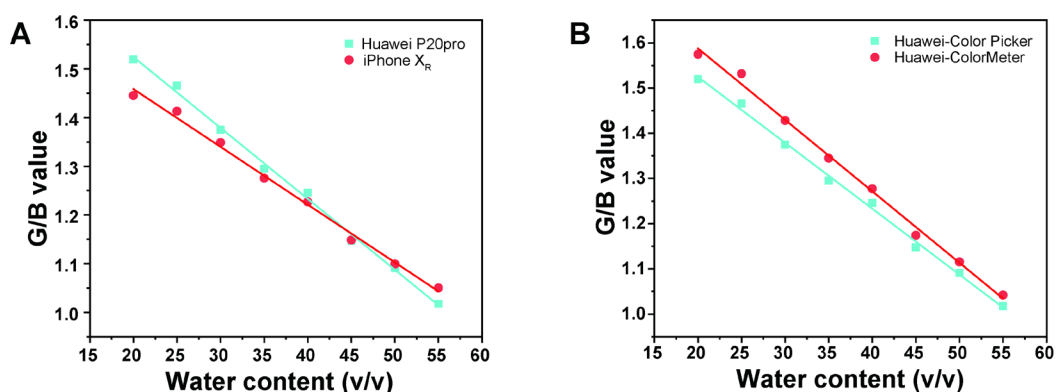

Fig. S12. (A) The linear relationship between G/B value and water contents obtained by Huawei P20pro and iPhone XR. (B) The linear relationship between G/B value and water contents in the same image analyzed by Color Picker and ColorMeter.

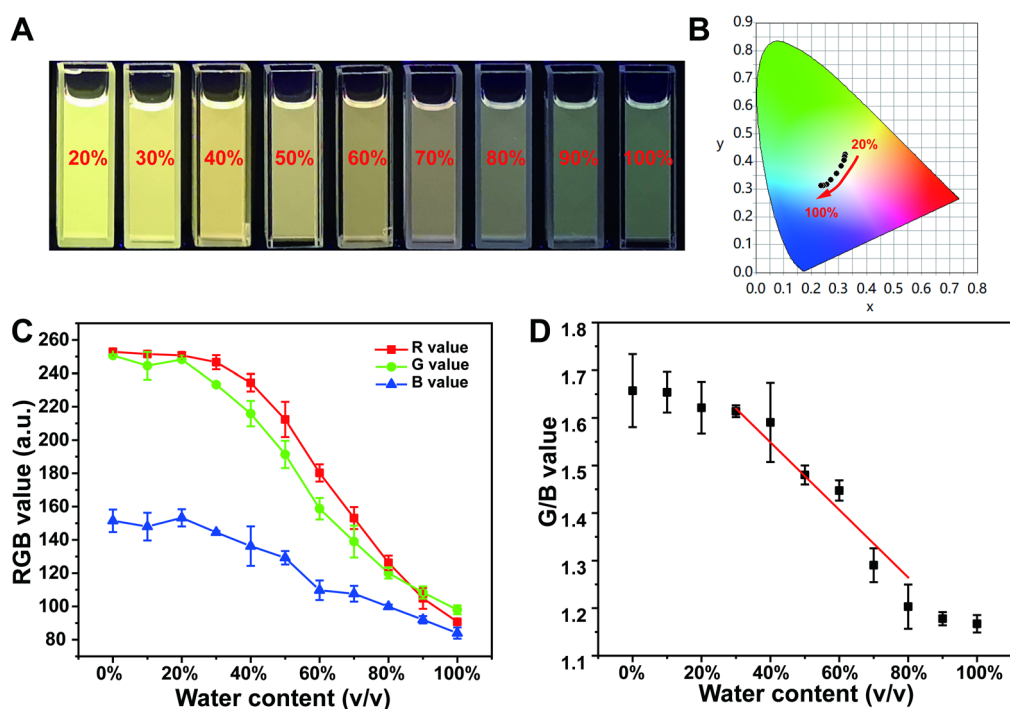

Fig. S13. (A) The picture of sample in DMSO with different water contents under 365 nm UV excitation. (B) CIE diagram displaying the (x, y) color coordinates of samples with different water contents in DMSO. (C) The change of color determined by RGB model in different water contents in DMSO. (D) The linear relationship between the ratio of G value and B value (G/B value) and the water contents in DMSO.

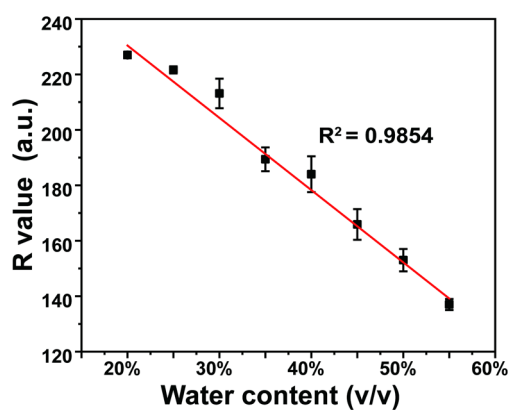

Fig. S14. The linear relationship between R value and water contents in ethanol expressed as  $y = -2.6072x + 282.5491$  ( $R^2 = 0.9854$ ) with a detection limit of 1.51%. The water contents were determined to be 25.0% and 27.1% in 65 degrees white wine and 75% medical alcohols.

**Table S1.** The color data with colorimetric smartphone-based detection of water contents in DMSO.

| Color                                                                               | Water content (%) | R value (a.u.) | G value (a.u.) | B value (a.u.) |
|-------------------------------------------------------------------------------------|-------------------|----------------|----------------|----------------|
|    | 20                | 251            | 248            | 153            |
|    | 30                | 247            | 233            | 144            |
|    | 40                | 234            | 216            | 136            |
|    | 50                | 212            | 191            | 130            |
|    | 60                | 180            | 159            | 110            |
|    | 70                | 153            | 139            | 108            |
|    | 80                | 126            | 120            | 100            |
|  | 90                | 105            | 108            | 92             |
|  | 100               | 91             | 98             | 84             |



**Table S2.** The color data with colorimetric smartphone-based detection of water contents in ethanol.

| Color                                                                               | Water content (%) | R value (a.u.) | G value (a.u.) | B value (a.u.) |
|-------------------------------------------------------------------------------------|-------------------|----------------|----------------|----------------|
|    | 20                | 227            | 206            | 116            |
|    | 25                | 222            | 195            | 117            |
|    | 30                | 213            | 182            | 115            |
|    | 35                | 190            | 166            | 114            |
|    | 40                | 184            | 160            | 117            |
|    | 45                | 166            | 143            | 116            |
|   | 50                | 153            | 137            | 115            |
|  | 55                | 137            | 129            | 115            |

**Table S3.** Comparison of detection of water in ethanol based on different fluorescence nanomaterials.

| Methods/Materials | Limit of detection (LOD) | Linear detection range | Comments                                              | Ref.      |
|-------------------|--------------------------|------------------------|-------------------------------------------------------|-----------|
| CQDs              | 0.01%                    | 0.01%~10%              | Narrow detection range and single-emission            | 10        |
| RCDs              | 0.36%                    | 10%~60%                | Single-emission                                       | 11        |
| Eu-MOFs/N, S-CDs  | 0.03%                    | 0.05%~4%               | Narrow detection range                                | 24        |
| CDs-CuNCs         | 0.95%                    | 2.5%~45%               | Low accuracy                                          | 28        |
| PMVEM-Ag NCs      | 4.48%                    | 20%~55%                | Intrinsically dual-emission and broad detection range | This work |
